# Supplementary material
Source: ML conference proceedings conference paper supplement (https://proceedings.mlr.press/v130/sun21a.html)
Supplement: Supplementary file 1 [file sun21a-supp.pdf]

---

# Supplementary Material for the Paper: Amortized Bayesian Prototype Meta-learning: A New Probabilistic Meta-learning Approach to Few-shot Image Classification

---

## 1 Overview

In this document, we present details of experimental settings, including hyper-parameters (batch size, learning rate, etc.). We also provide pseudo-code for meta-validation/meta-testing and detailed statistics in plots and figures. All experiments are implemented with PyTorch.

## 2 Pseudo-code for Meta-validation/Meta-testing

---

**Algorithm 2** Meta-validation/Meta-testing of the proposed method

---

**Require:** Input Meta-trained model  $\hat{\mathcal{M}}$ . Set  $\tilde{\mathcal{D}} = \mathcal{D}_{val}$  or  $\mathcal{D}_{te}$ .

- 1: **for**  $i$  from 1 to  $E$  **do**:
  - 2:   Generate a task  $\mathcal{T}_i = \mathcal{S}_i \cup \mathcal{Q}_i$  from  $\tilde{\mathcal{D}}$ .
  - 3:   Initialize  $\phi_i \leftarrow \theta$ .
  - 4:   **for**  $d$  from 1 to  $D$  **do**:
  - 5:     Compute  $q_{\phi_i}(z|\mathcal{S}_i)$ .
  - 6:     Approximate  $KL$ .
  - 7:     Update variational parameters  $\phi_i \leftarrow \phi_i - \alpha \nabla_{\phi_i} \{\mathcal{L}_{PR}(\mathcal{S}_i|z) + KL[q_{\phi_i}(z|\mathcal{S}_i) || p(z|\theta)]\}$ .
  - 8:   Predict for an image  $x$ :  $\hat{y} = \arg \max_c \Pr(\mu(x)|q_{\phi_i}(z_c|\mathcal{S}_{i,c}))$ ,  $c \in [C]$ .
  - 9:   Compute prediction accuracy  $a_i$  for  $\mathcal{Q}_i$ .
  - 10: Output mean accuracy  $\frac{1}{E} \sum_{i=1}^E a_i$  as  $\hat{\mathcal{M}}$ 's performance.
- 

## 3 Proofs

### 3.1 Proof for Eq.2

In this section, we provide a detailed derivation of the evidence lower bound of  $\log p_{\theta}(\mathcal{S})$ .

$$\log p_{\theta}(\mathcal{S}) \geq \mathbb{E}_{z \sim q_{\phi}(z)} [\log p_{\theta}(\mathcal{S}|z)] - \mathbb{KL}[q_{\phi}(z) || p_{\theta}(z)]$$

**Proof:**

$$\begin{aligned} \log p_{\theta}(\mathcal{S}) &= \log \int p_{\theta}(\mathcal{S}, z) dz \\ &= \log \int p_{\theta}(\mathcal{S}, z) \frac{q_{\phi}(z)}{q_{\phi}(z)} dz \\ &= \log \mathbb{E}_q \left[ \frac{p_{\theta}(\mathcal{S}, z)}{q_{\phi}(z)} \right] \\ &\geq \mathbb{E}_q \left[ \log p_{\theta}(\mathcal{S}|z) + \log \frac{p_{\theta}(z)}{q_{\phi}(z)} \right] \quad , \text{ by Jensen's inequality} \\ &= \mathbb{E}_q \left[ \log p_{\theta}(\mathcal{S}|z) \right] - \mathbb{KL} \left[ q_{\phi}(z) || p_{\theta}(z) \right] \end{aligned}$$

### 3.2 Unbiased Estimator Scaled by A Constant

Although we replace the  $\mathbb{KL}$  term in the evidence lower bound of  $\log p_\theta(\mathcal{S})$  with Eq.7 as our proposed prior distribution of  $z$  is now dependent on the support set  $\mathcal{S}$ , our estimator to Eq.4 is still an unbiased estimator to evidence lower bound of  $\log p_\theta(\mathcal{S})$  in Eq.2 (scaled by a constant). Therefore the proposed method still learns to learn the approximate posteriors of latent  $z$  conditional on  $\mathcal{S}$  properly. To appreciate this, note that during the inference stage  $\tau$  is the support set  $\mathcal{S}$  (and we have  $|\tau| = CK$ ). Then, after putting the unbiased estimator of Eq.7 and Eq.9 into Eq.4, we can rewrite the loss in Eq.4 as

$$\mathcal{L}(\mathcal{S}) = \frac{1}{CK} \sum_{c=1}^C \sum_{i=1}^K \left( -\log \left( \frac{\Pr \left[ \mu(x_i^{(\mathcal{S}_c)}) | z_c \right]}{\sum_{k=1}^C \Pr \left[ \mu(x_i^{(\mathcal{S}_c)}) | z_k \right]} \right) + \mathbb{KL}[q_\phi(z_c | \mathcal{S}_c) || p_\theta(z_c; \mu(x_i^{(\mathcal{S}_c)}), \Sigma(x_i^{(\mathcal{S}_c))))] \right)$$

, where  $\mathcal{S}_c$  is the subset of  $\mathcal{S}$  and only contains all support images from the class  $c \in \{1, \dots, C\}$ , and  $(x_i^{(\mathcal{S}_c)}, y_i^{(\mathcal{S}_c)} = c)$  is the  $i^{\text{th}}$  image in  $\mathcal{S}_c$ . This immediately tells that  $-\mathcal{L}(\mathcal{S}) = \frac{1}{CK} \sum_{c=1}^C \sum_{i=1}^K (\log p_\theta(y_i^{(\mathcal{S}_c)} | x_i^{(\mathcal{S}_c)}, z_c) - \mathbb{KL}[q_\phi(z_c | \mathcal{S}_c) || p_\theta(z_c; \mu(x_i^{(\mathcal{S}_c)}), \Sigma(x_i^{(\mathcal{S}_c)))]])$ , where the terms inside the double summation is an unbiased estimator of the evidence lower bound of  $\log p_\theta(y_i^{(\mathcal{S}_c)} | x_i^{(\mathcal{S}_c)})$ . Since  $\frac{1}{CK} \sum_{c,i} \log p_\theta(y_i^{(\mathcal{S}_c)} | x_i^{(\mathcal{S}_c)}) = \frac{1}{CK} \log p_\theta(\mathcal{S})$ , it tells that  $-\mathcal{L}(\mathcal{S})$  is an unbiased estimator of the evidence lower bound of  $\log p_\theta(\mathcal{S})$  scaled by a factor of  $1/CK$ .

## 4 Experimental Details

At the meta-training stage, except that the maximum training epoch is 12000 for 1-shot classification on *mini-ImageNet*, the maximum training epoch is set to be 3500 epochs for all the other experiments. We use a mini-batch of tasks consisting  $T$  tasks to update the shared  $\theta$  during meta-training.

We select the optimal meta-training epoch on the meta-validation set according to classification accuracy. At the meta-testing stage, we randomly sample 600 novel tasks from the meta-testing set, and report the mean accuracy with its 95% confidence interval, i.e., mean acc.  $\pm 1.96 \frac{\text{std}}{\sqrt{600}}$ . For  $C$ -way  $K$ -shot, a task is constructed by sampling  $C$  classes and then subsequently sampling  $K + M$  instances for each class, with  $K$  being the number of support images in each class. In our experiments,

- *Omniglot*:  $M = 15$  for meta-training/meta-validation/meta-testing;
- *mini-ImageNet*:  $M = 16$  for meta-training and meta-validation,  $M = 15$  for meta-testing;
- *CUB-200-2011*:  $M = 16$  for meta-training and meta-validation,  $M = 15$  for meta-testing;
- *Stanford-dogs*:  $M = 16$  for meta-training and meta-validation,  $M = 15$  for meta-testing.

The values of  $T$ ,  $D$ ,  $\alpha$  and  $\beta$  in **Alg. 1** and **Alg. 2** are set to be

- *Omniglot*:  $T = 32$ ,  $D = 1$ ,  $\alpha = 0.1$ ,  $\beta = 0.001$ ;
- *mini-ImageNet*:  $T = 4$ ,  $D = 5$ ,  $\alpha = 0.01$ ,  $\beta = 0.001$ ;
- *CUB-200-2011*:  $T = 4$ ,  $D = 5$ ,  $\alpha = 0.01$ ,  $\beta = 0.001$ ;
- *Stanford-dogs*:  $T = 4$ ,  $D = 5$ ,  $\alpha = 0.01$ ,  $\beta = 0.001$ .

In addition, we use standard stochastic gradient descent to generate variational parameters  $\phi_i$ , during meta-training/meta-validation/meta-testing, for a task  $\mathcal{T}_i$  and for all  $i$ . We use the *Adam* optimizer to update the shared parameter  $\theta$  at meta-training stage.

---

## 5 Details of Figures

In this section, we present detailed statistics in **Fig. 2**.

Ablation study in **Fig.2-a**.

| $C$ -way at meta-testing | Meta-training conditions |                   |
|--------------------------|--------------------------|-------------------|
|                          | 5-way 5-shot (%)         | 10-way 5-shot (%) |
| $C = 5$                  | $99.45 \pm 0.09$         | $99.44 \pm 0.08$  |
| $C = 10$                 | $98.97 \pm 0.08$         | $99.14 \pm 0.08$  |
| $C = 15$                 | $98.45 \pm 0.09$         | $98.80 \pm 0.09$  |
| $C = 20$                 | $98.14 \pm 0.09$         | $98.52 \pm 0.08$  |
| $C = 25$                 | $97.85 \pm 0.09$         | $98.20 \pm 0.08$  |
| $C = 30$                 | $97.44 \pm 0.09$         | $97.87 \pm 0.08$  |
| $C = 35$                 | $97.17 \pm 0.09$         | $97.63 \pm 0.08$  |
| $C = 40$                 | $96.84 \pm 0.08$         | $97.34 \pm 0.08$  |
| $C = 45$                 | $96.57 \pm 0.08$         | $97.12 \pm 0.08$  |
| $C = 50$                 | $96.30 \pm 0.08$         | $96.85 \pm 0.08$  |

Ablation study in **Fig.2-b**.

| $K$ -shot at meta-testing | Meta-training conditions |                   |
|---------------------------|--------------------------|-------------------|
|                           | 5-way 5-shot (%)         | 10-way 5-shot (%) |
| $K = 2$                   | $98.65 \pm 0.27$         | $98.38 \pm 0.15$  |
| $K = 4$                   | $99.47 \pm 0.11$         | $99.00 \pm 0.11$  |
| $K = 5$                   | $99.60 \pm 0.10$         | $99.17 \pm 0.09$  |
| $K = 6$                   | $99.53 \pm 0.11$         | $99.19 \pm 0.10$  |
| $K = 8$                   | $99.59 \pm 0.10$         | $99.06 \pm 0.13$  |
| $K = 10$                  | $99.61 \pm 0.09$         | $99.32 \pm 0.10$  |
| $K = 12$                  | $99.60 \pm 0.09$         | $99.34 \pm 0.09$  |

- *Omniglot*: Dropout with a keep probability of 0.9.
- *mini-ImageNet*: Dropout with a keep probability of 0.5.

Ablation study in **Fig.2-c**.

| <i>KL</i> | <i>Dropout</i> | <i>Omniglot (%)</i> | <i>mini-ImageNet (%)</i> |
|-----------|----------------|---------------------|--------------------------|
| -         | -              | 96.16 $\pm$ 0.28    | 43.08 $\pm$ 0.62         |
| ✓         | -              | 99.54 $\pm$ 0.08    | 70.44 $\pm$ 0.72         |
| ✓         | ✓              | 99.50 $\pm$ 0.08    | 69.92 $\pm$ 0.67         |

## 6 Comparisons of Convolution Networks

Here, we present details of shallow convolution networks used in the probabilistic meta-learning methods listed in **Table 1**. CONV- $X$  means a convolution network with  $X$  convolution blocks.

Convolution networks of methods in **Table 1**.

|              | <i>Omniglot</i> | <i>mini-ImageNet</i> |
|--------------|-----------------|----------------------|
| BMAML        | CONV-5          | CONV-5               |
| PLATIPUS     | CONV-4          | CONV-4               |
| VAMPIRE      | CONV-4          | CONV-4               |
| ABML         | CONV-4          | CONV-4               |
| Amortized VI | CONV-4          | CONV-5               |
| VERSA        | CONV-4          | CONV-5               |
| Meta-Mixture | CONV-4          | CONV-4               |
| DKT          | CONV-4          | CONV-4               |
| Ours         | CONV-4          | CONV-4               |

## 7 Effect of $D$

We also take the effect of  $D$  into account. Recall that  $D$  is the number of updates of the inner loop for the approximate inference. We consider the cases when  $D = 1$ ,  $D = 3$  and  $D = 5$ . Performance for each choice of  $D$  is measured on the meta-testing set.

Effect of  $D$ .

| <i>mini-ImageNet</i> | $D = 1(\%)$      | $D = 3(\%)$      | $D = 5(\%)$      |
|----------------------|------------------|------------------|------------------|
| 5-way 1-shot         | 52.79 $\pm$ 0.94 | 53.29 $\pm$ 0.89 | 53.28 $\pm$ 0.91 |
| 5-way 5-shot         | 69.63 $\pm$ 0.70 | 70.56 $\pm$ 0.70 | 70.44 $\pm$ 0.72 |
